# Supplementary material for: Thiol-mediated etching of gold nanorods as a neoteric strategy for room-temperature and multicolor detection of nitrite and nitrate
Source: Royal Society of Chemistry journal article supplement (doi:10.1039/d1ay01117k), 2021-01-01
Supplement: d1ay01117k1.pdf [file d1ay01117k1.pdf]

## Supporting information

### **Thiol-mediated etching of gold nanorods as a neoteric strategy for room-temperature and multicolor detection of nitrite and nitrate**

Marzieh Sepahvand,<sup>a</sup> Forough Ghasemi,<sup>b,\*</sup> Hossein Mir Seyed Hosseini<sup>a,\*</sup>

<sup>a</sup>Department of Soil Science, College of Agriculture and Natural Resources, University of Tehran, Karaj, Iran

<sup>b</sup>Department of Nanotechnology, Agricultural Biotechnology Research Institute of Iran (ABRII), Agricultural Research, Education, and Extension Organization (AREEO), Karaj, 3135933151, Iran

\*Corresponding authors:

Forough Ghasemi; email: [forough.ghasemi@abrii.ac.ir](mailto:forough.ghasemi@abrii.ac.ir)

Hossein Mir Seyed Hosseini; email: [mirseyed@ut.ac.ir](mailto:mirseyed@ut.ac.ir)

## Table of content

| Figure/Table                                                                                                                                                                                                                                                                                                                                                                      | Page       |
|-----------------------------------------------------------------------------------------------------------------------------------------------------------------------------------------------------------------------------------------------------------------------------------------------------------------------------------------------------------------------------------|------------|
| <b>Table S1.</b> Characteristics of water, soil, salami, and sausage samples used for nitrite assay                                                                                                                                                                                                                                                                               | <b>S3</b>  |
| <b>Fig. S1.</b> The linear relationship between the response ( $A_{540nm}$ ) from Griess assay and the concentration of (a) nitrite and (b) nitrate (after reduction step)                                                                                                                                                                                                        | <b>S4</b>  |
| <b>Fig. S2.</b> Intensity size distribution of the developed probe in the absence and presence of nitrite ( $40 \mu\text{mol L}^{-1}$ )                                                                                                                                                                                                                                           | <b>S5</b>  |
| <b>Fig. S3.</b> The effect of pH on the AuNRs etching in the presence of $5.0 \text{ mmol L}^{-1}$ of glycine-HCl buffer at different pHs, $150 \mu\text{mol L}^{-1}$ of nitrite ion, $40 \text{ mmol L}^{-1}$ of CTAB, and $25 \text{ mmol L}^{-1}$ of thiourea at time 30 min                                                                                                   | <b>S6</b>  |
| <b>Fig. S4.</b> (a) Absorbance spectra of the probe in the presence of different concentrations of nitrate ( $0.5\text{-}3.0 \text{ mmol L}^{-1}$ ). (b) The linear relationship between the response ( $S_0\text{-}S$ ) and the concentration of nitrate. (c) The images of the probe in the presence of different concentrations of nitrite at the top of a white 96-well plate | <b>S7</b>  |
| <b>Fig. S5.</b> Intensity size distribution of the developed probe in the absence and presence of nitrate ( $2.0 \text{ mmol L}^{-1}$ )                                                                                                                                                                                                                                           | <b>S8</b>  |
| <b>Table S2.</b> Comparison of reported colorimetric methods based on AuNPs for the detection of nitrite and nitrate                                                                                                                                                                                                                                                              | <b>S9</b>  |
| <b>References</b>                                                                                                                                                                                                                                                                                                                                                                 | <b>S10</b> |

**Table S1.** Characteristics of water, soil, salami, and sausage samples used for nitrite assay

| <b>Sample</b>  | <b>EC (ds m<sup>-1</sup>)</b> | <b>pH</b> | <b>Sand (%)</b> | <b>Silt (%)</b> | <b>Clay (%)</b> | <b>Soil texture</b> |
|----------------|-------------------------------|-----------|-----------------|-----------------|-----------------|---------------------|
| Campus water   | 0.29                          | 7.50      | -               | -               | -               | -                   |
| Tap water      | 0.75                          | 7.40      | -               | -               | -               | -                   |
| Well water (1) | 0.37                          | 7.80      | -               | -               | -               | -                   |
| Well water (2) | 0.48                          | 7.80      | -               | -               | -               | -                   |
| Well water (3) | 0.41                          | 7.60      | -               | -               | -               | -                   |
| Soil (tomato)  | 1.6                           | 8.37      | 25.5            | 39.1            | 35.4            | Clay loam           |
| Soil (pepper)  | 1.1                           | 8.42      | 29.5            | 35.3            | 35.2            | Clay loam           |
| Soil (onion)   | 1.2                           | 8.40      | 26.5            | 37.3            | 36.2            | Clay loam           |
| Soil (apple)   | 1.52                          | 8.41      | 36.5            | 36.3            | 27.2            | Clay loam/Loam      |
| Soil (maize)   | 2.73                          | 8.18      | 30.0            | 50.0            | 20.0            | Silt loam/Loam      |
| Salami         | 1.62                          | 5.71      | -               | -               | -               | -                   |
| Sausage        | 1.53                          | 5.70      | -               | -               | -               | -                   |

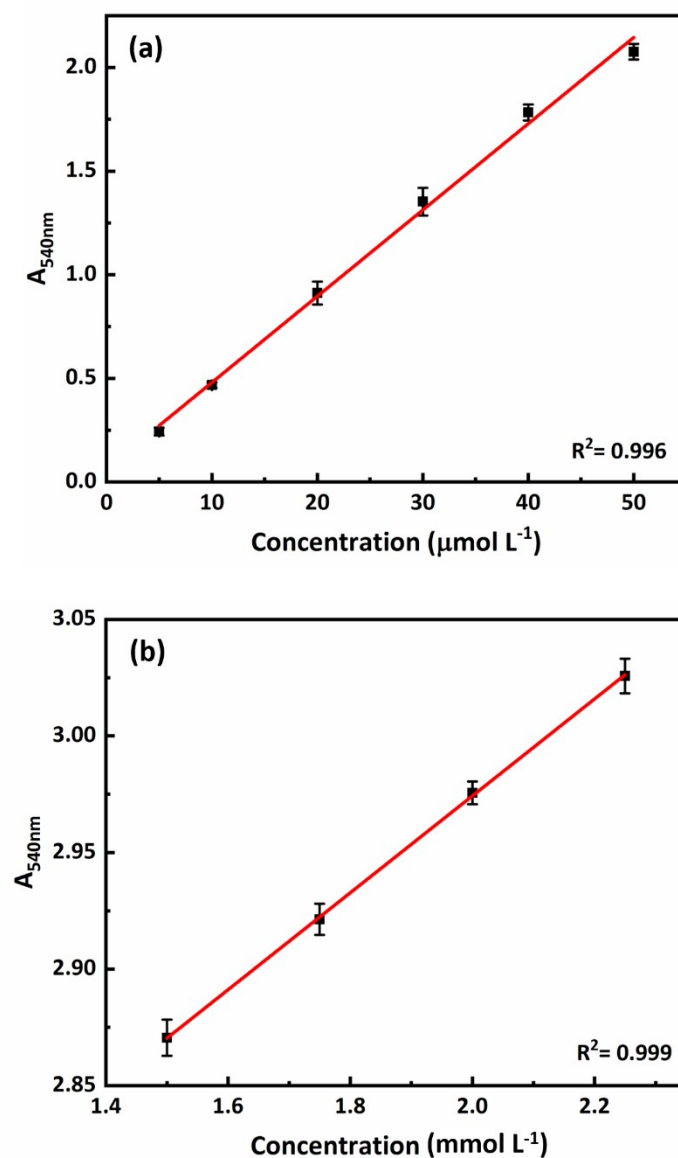

**Fig. S1.** The linear relationship between the response ( $A_{540\text{nm}}$ ) from Griess assay and the concentration of (a) nitrite and (b) nitrate (after reduction step)

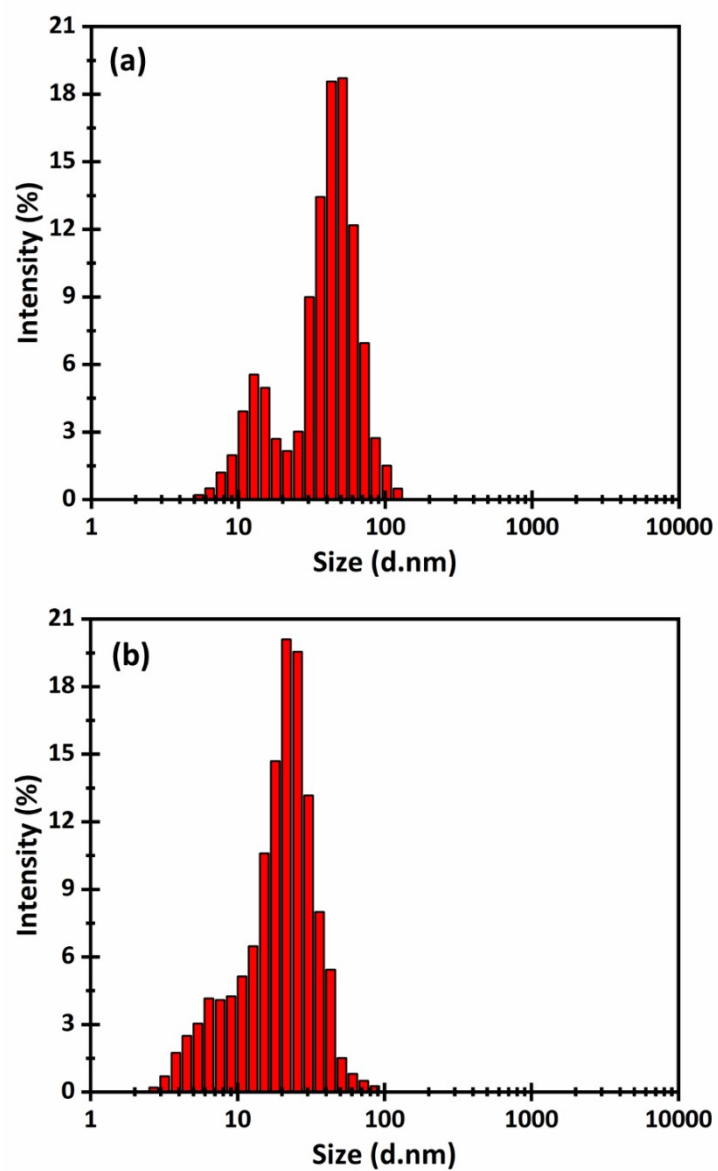

**Fig. S2.** Intensity size distribution of the developed probe in the absence and presence of nitrite ( $40 \mu\text{mol L}^{-1}$ )

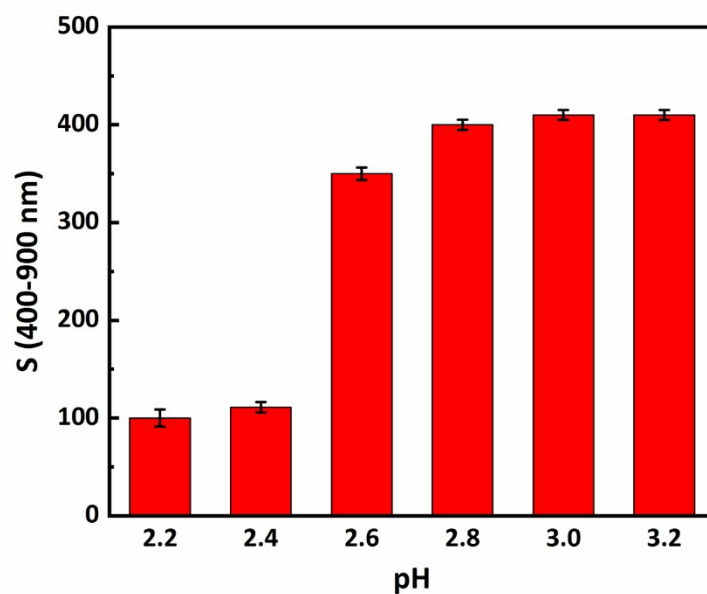

**Fig. S3.** The effect of pH on the AuNRs etching in the presence of 5.0 mmol L<sup>-1</sup> of glycine-HCl buffer at different pHs, 150  $\mu$ mol L<sup>-1</sup> of nitrite ion, 40 mmol L<sup>-1</sup> of CTAB, and 25 mmol L<sup>-1</sup> of thiourea at time 30 min

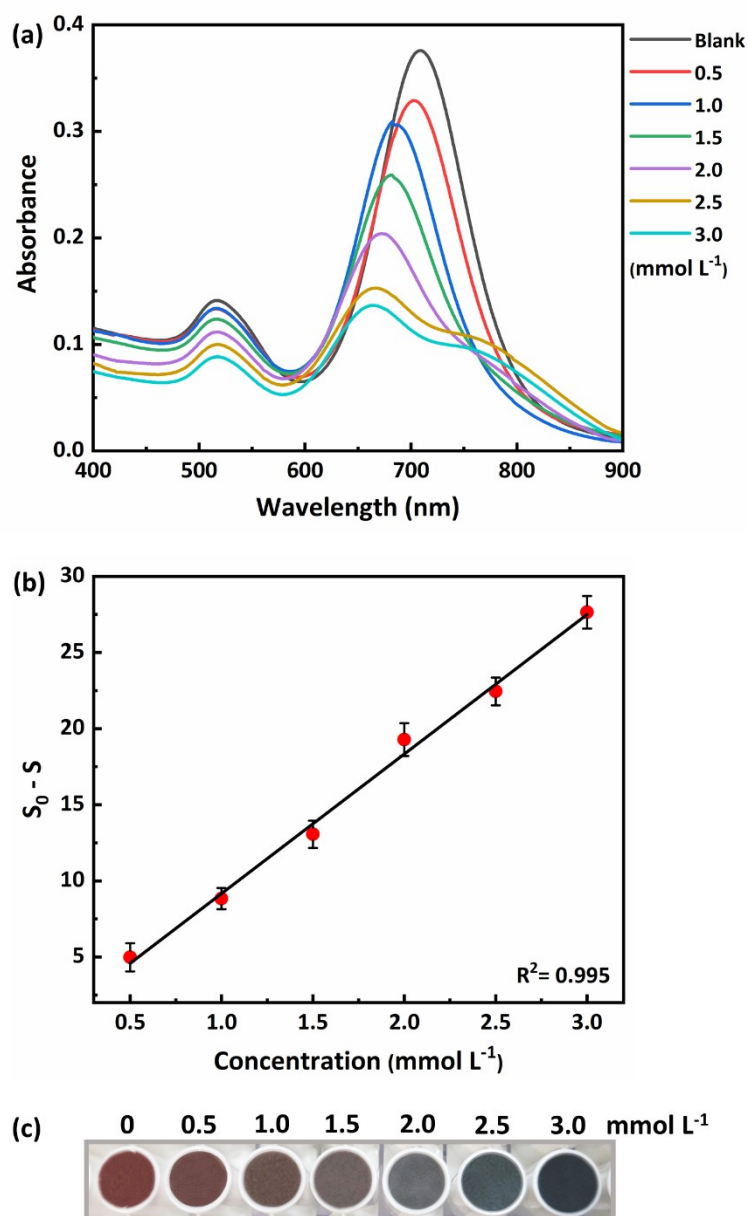

**Fig. S4.** (a) Absorbance spectra of the probe in the presence of different concentrations of nitrate (0.5-3.0 mmol L<sup>-1</sup>). (b) The linear relationship between the response ( $S_0 - S$ ) and the concentration of nitrate. (c) The images of the probe in the presence of different concentrations of nitrite at the top of a white 96-well plate

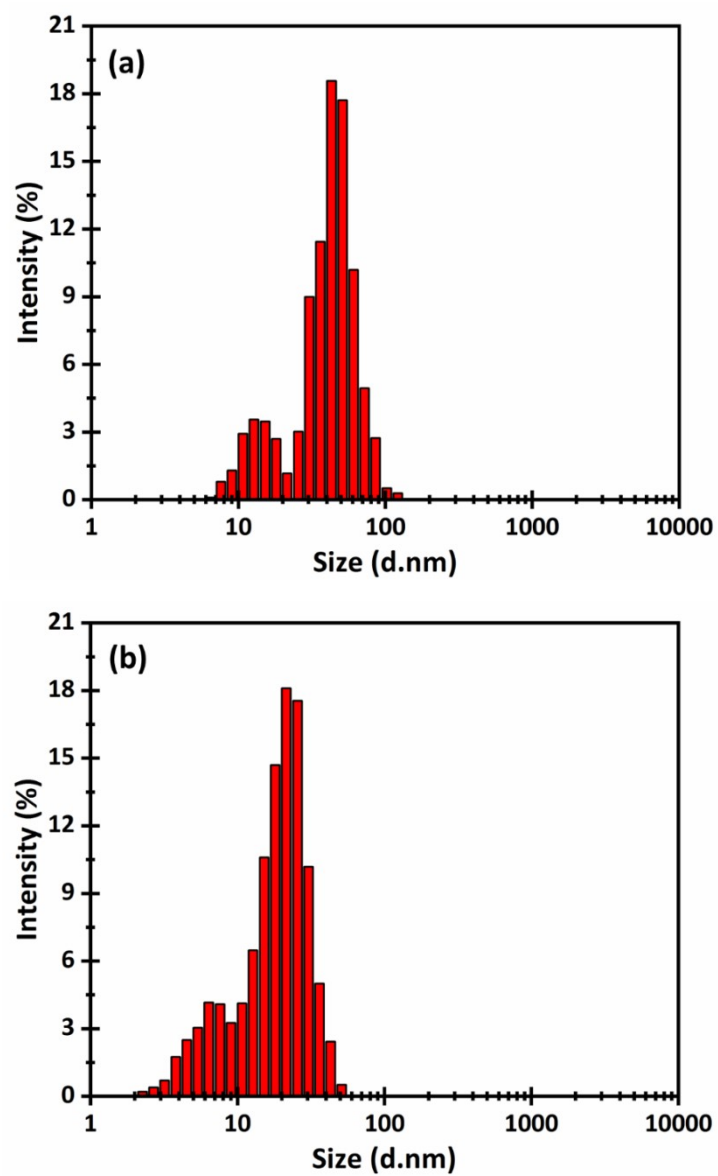

**Fig. S5.** Intensity size distribution of the developed probe in the absence and presence of nitrate ( $2.0 \text{ mmol L}^{-1}$ )

**Table S2.** Comparison of reported colorimetric methods based on AuNPs for the detection of nitrite and nitrate

| Plasmonic NPs                           | Shape of NPs | Mechanism        | Temperature (°C) | Real sample                                                                 | Nitrate detection | Ref.      |
|-----------------------------------------|--------------|------------------|------------------|-----------------------------------------------------------------------------|-------------------|-----------|
| Aniline- and naphthalene-modified AuNPs | Sphere       | Aggregation      | 95               | Drinking water                                                              | ✓                 | [1]       |
| 4-Aminothiophenol-modified AuNRs        | Rod          | Aggregation      | 95               | Drinking water                                                              | ×                 | [2]       |
| Citrate-capped AuNPs/ Phenylenediamine  | Sphere       | Anti-aggregation | 37               | Tap water                                                                   | ×                 | [3]       |
| Citrate-capped AuNPs/ 4-Aminothiophenol | Sphere       | Anti-aggregation | Room temperature | Under ground and tap water                                                  | ×                 | [4]       |
| AuNRs                                   | Rod          | Etching          | 55               | Drinking water                                                              | ×                 | [5]       |
| AuNRs                                   | Rod          | Etching          | Room temperature | Tap and well water, soil (pepper, onion, apple, maize), salami, and sausage | ✓                 | This work |

## References

1. W. L. Daniel, M. S. Han, J.-S. Lee and C. A. Mirkin, *Journal of the American Chemical Society*, 2009, **131**, 6362-6363.
2. N. Xiao and C. Yu, *Analytical chemistry*, 2010, **82**, 3659-3663.
3. J. Zhang, C. Yang, X. Wang and X. Yang, *Analyst*, 2012, **137**, 3286-3292.
4. Y. Ye, Y. Guo, Y. Yue and Y. Zhang, *Analytical Methods*, 2015, **7**, 4090-4096.
5. Z. Chen, Z. Zhang, C. Qu, D. Pan and L. Chen, *Analyst*, 2012, **137**, 5197-5200.
